# Supplementary material
Source: Springer Nature journal article supplement (https://www.springermedizin.de/resource/supplementary/12936_2009_979_MOESM3_ESM.pdf/9548706)
Supplement: MOESM3 [file 9548706]

(A)

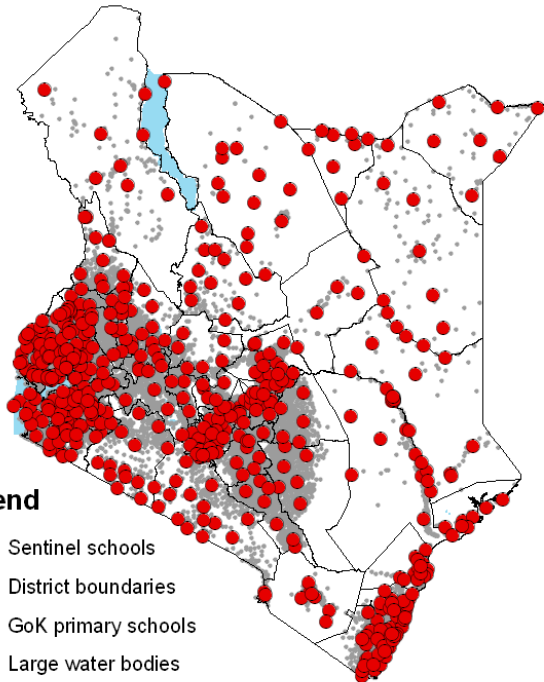

### Legend

- Sentinel schools
- District boundaries
- GoK primary schools
- Large water bodies

(B)

| Item                             | Cost (US\$)    |
|----------------------------------|----------------|
| Personnel                        | 134,553        |
| Malaria RDTs                     | 27,040         |
| Haemoglobin machines & curvettes | 45,125         |
| Malaria slide QA reading         | 50,625         |
| Other laboratory consumables     | 13,890         |
| Direct data entry & management   | 36,975         |
| Transportation & communication   | 116,600        |
| Sensitization                    | 3,000          |
| <b>Overall cost</b>              | <b>427,808</b> |
| Cost per school                  | 1,028          |

(C)

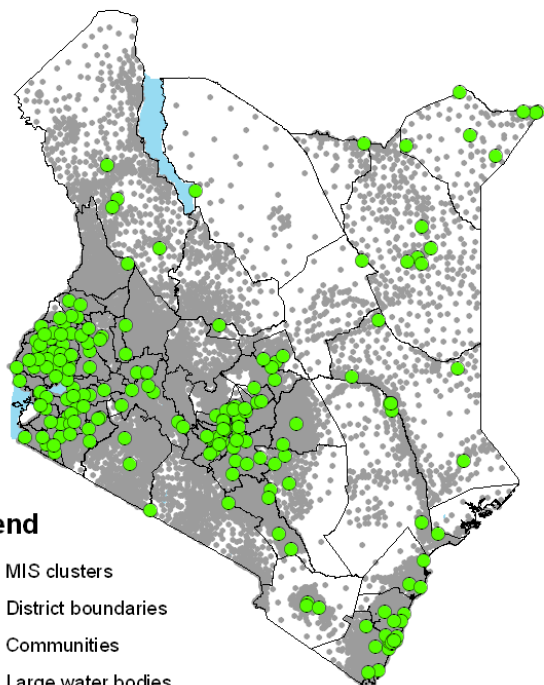

### Legend

- MIS clusters
- District boundaries
- Communities
- Large water bodies

(D)

| Item                             | Cost (US\$)        |
|----------------------------------|--------------------|
| Personnel                        | 267,406            |
| Malaria RDTs                     | 10,000             |
| Haemoglobin machines & curvettes | 24,375             |
| Malaria slide QA reading         | 7,802 <sup>1</sup> |
| Other laboratory consumables     | 12,447             |
| Direct data entry & management   | 12,850             |
| Transportation & communication   | 221,575            |
| Sensitization                    | 93,475             |
| <b>Overall cost</b>              | <b>649,930</b>     |
| Cost per cluster                 | 3,299              |

<sup>1</sup> We assumed that blood slides are also made in addition to the use of rapid diagnostic tests, and that 30% of slides are read using quality assurance (QA) procedures.
